# Supplementary material for: The impact of patient-reported outcome (PRO) data from clinical trials: a systematic review and critical analysis
Source: Health Qual Life Outcomes. 2019 Oct 16;17:156. doi: 10.1186/s12955-019-1220-z (PMC6796482; doi:10.1186/s12955-019-1220-z)
Supplement: Supplementary file 4 — Additional file 4. REF impact case studies [file 12955_2019_1220_MOESM4_ESM.xlsx]

## Sheet: Demographic table
Case study	Submitting Institution	Clinical area	Trial name	Year of publication	Trial design	Leading study centre	Trial phase	Primary outcome	Secondary outcomes	PRO instrument	Primary outcome significance	Secondary outcome significance	Type of impact
Heart failure: Improving the quality of life and survival of heart failure patients through Cardiac Resynchronisation Therapy (CARE-HF)	University of Birmingham	Public Health, Health Services and Primary Care	The effect of cardiac resynchronization on morbidity and mortality in heart failure	2005	Multi-centre, international randomised controlled trial	UK	Phase III	Time of death from any cause or unplanned hospitalisation as a consequence of a major cardiovascular event	Death from any cause Composite of death from any cause Unplanned hospitalization with heart failure The New York Heart Association (NYHA) class Quality of life at 90 days	Minnesota Living with Heart Failure questionnaire and EQ-5D	In the cardiac-resynchronization group, 82 patients died, as compared with 120 patients who had been assigned to medical therapy alone (20 percent vs. 30 percent; hazard ratio, 0.64; 95 percent confidence interval, 0.48 to 0.85; P<0.002)	Cardiac resynchronization reduced the risk of the composite end point of death from any cause or hospitalization for worsening heart failure (hazard ratio, 0.54; 95 percent confidence interval, 0.43 to 0.68; P<0.001). Patients in the cardiac-resynchronization group had less severe symptoms (P<0.001) and a better quality of life (P<0.001) at 90 days. At 18 months, 105 of the patients in the cardia…	Indirect PRO impact
Addressing a priority of people with rheumatoid arthritis: Managing fatigue	University of West England, Bristol	Allied Health Professions, Dentistry, Nursing and Pharmacy	Self-management of fatigue in rheumatoid arthritis: a randomised controlled trial of group cognitive-behavioural therap	2011	Two-arm, parallel randomised controlled trial	UK	Not specified	Impact of fatigue at 18 weeks among group cognitive behavioural therapy (CBT) for fatigue self-management	Severity of fatigue, coping, pain, perceived disease activity and disability	Multi-dimensional Assessment of Fatigue (MAF; VAS), the Rheumatoid Arthritis Quality of Life (RAQoL) questionnaire, Hospital Anxiety and Depression Scale (HDAS), Arthritis Helpssness Index, Arthritis Self-Efficacy Scale (RASE, 28-140)	MAF 28.99 versus 23.99 (adjusted difference −5.48, 95% CI −9.50 to −1.46, p=0.008); VAS 5.99 versus 4.26 (adjusted difference −1.95, 95% CI −2.99 to −0.90, p<0.001)	There were improvents on fatigue coping, perceived severity, disability, depression, helplesness, self-efficacy and sleep on the CBT group. There was no effect on disease activity, pain, anxiey, quality of life or disability impact	No Evidence of PRO Impact
Living with Multiple Sclerosis: development and use of effective self-management strategies	Brunel University	Allied Health Professions, Dentistry, Nursing and Pharmacy	Evaluation of the effectiveness of professionally guided self-care for people with multiple sclerosis living in the community: a randomized controlled trial	2002	Single-blind randomised controlled trial	UK	Not specified	Performance in activities of daily living, quality of life and independece among multple sclerosis participants, comparing the use of a self-care booklet with placebo	Not specified	Short Form-36 (SF-36) and Standard Day Dependency Record (SDDR)	Improvements in health status were small. However, at follow-up the intervention group had better SF-36 health scores, in mental health (p = 0.04), and vitality (p = 0.05) and considered help with daily activities to be less essential, as measured by the SDDR (p = 0.04), than the control group. Participants in the intervention group had maintained levels of independence at follow-up (p = 0.62) wh…	Not specified	No Evidence of PRO Impact
Anastrozole for oestrogen receptor positive breast cancer (ATAC trial)	Queen Mary University of London	Clinical Medicine	Results of the ATAC (Arimidex, Tamoxifen, Alone or in Combination) trial after completion of 5 years' adjuvant treatment for breast cancer	2005	Multi-centre, international randomised controlled trial	UK	Not specified	Disease-free survival and occurrence of adverse events	Time to recurrence, which included new contralateral tumours, but not deaths from non-breast-cancer causes before recurrence; time to distant recurrence; censoring at deaths without recurrence; contralateral breast cancer; death after recurrence; and overall survival.	NA	Disease-free survival at 3 years was 89.4% on anastrozole and 87.4% on tamoxifen. Results with the combination were not significantly different from those with tamoxifen alone.	There was no major difference in the number of patients who died from any cause before a breast-cancer recurrence. Anastrozole also showed a greater benefit for this endpoint in comparison with the combination treatment. However, no difference was seen between the tamoxifen-alone group and the combination group.	No Evidence of PRO Impact
Sentinel lymph node biopsy in breast cancer	Queen Mary University of London	Clinical Medicine	Morbidity after sentinel lymph node biopsy in primary breast cancer: Results from a randomized controlled trial	2005	Randomised controlled trial	UK	Phase III	Assessment of physical morbidity (numbness and paresthesia, arm swelling, shoulder mobility, and seroma formation) and psychological morbidity	Not specified	Short Form-36 (SF-36) and the visual analogue QOL scale	QOL scale: The QOL scores were usually higher (better) in the study group, and significantly so immediately postoperatively (P = .01). SF-36: In the immediate postoperative period, the physical combined score (P = .001), physical functioning score (P = .003), and vitality score (P = .004) were significantly higher (better) in the study group. In node-negative patients, the study group had signifi…	Not specified	Indirect PRO impact
Dementia friendly care & support in extra care housing and acute hospital settings	University of Worcester	Allied Health Professions, Dentistry, Nursing and Pharmacy	Enriched Opportunities Programme: A cluster randomised controlled trial of a new approach to living with dementia and other mental health issues in extra care housing schemes and villages	2011	Cluster randomised trial	UK	Phase III	To assess whether the Enriched Opportunity Programme enabled individuals with dementia to remain in extra care housing scheme over time and whether their quality of life improve	Perceived levels of social support and quality of relationships and impact on diversity of occupation and observed well-being in public areas	Alzheimer disease-related quality of life scale (QOL-AD), geriatric depression scale (GDS); and Duke Social Support Index (DSSI)	Better quality of life over time (4.0 (SE 0.6) units; 14% p < 0.001) than the active control (1.3 (SE 0.6) units; 4% p = 0.003).	At baseline the mean score in the control group was 18.6, compared to 17.0 in the intervention group. This difference, though small, was statistically significant ( p = 0.002)	No Evidence of PRO Impact
Self-management intervention for men with lower urinary tract symptoms: development, phased evaluation and global adoption	University College London	Clinical Medicine	Self management for men with lower urinary tract symptoms: randomised controlled trial	2007	Randomised controlled trial	UK	Phase III	Treatment failure at 3, 6, and 12 months.	Severity of symptoms, troublesomeness of symptoms, and disease specific quality of life	International prostate symptom score (I-PSS), benign prostatic hypertrophy impact index; and American Urological Association quality of life score (AUASS)	At three months, treatment failure had occurred in 7 (10%) of the self-management group and in 27 (42%) of the standard care group (difference=32%, 95% confidence interval 18% to 46%). Corresponding differences in the frequency of treatment failure were 42% (27% to 57%) at six months and 48% (32% to 64%) at 12 months. At three months, the mean international prostate symptom score was 10.7 in the …	At 3, 6, and 12 months, patients who were randomised to self management had less severe symptoms than patients randomised to standard care alone (table 2⇑). The differences in international prostate symptom score increased only slightly when we adjusted them for baseline characteristics. For example, the difference at six months increased from 6.5 (4.3 to 8.7) without adjustment to 7.5 (5.7 to 9.…	Direct PRO impact
Targeting endothelin in systemic sclerosis - improved survival in pulmonary arterial hypertension (PAH) in systemic sclerosis and licensing of the first drug specifically for digital ulcers in systemic sclerosis	University College London	Clinical Medicine	Long-term effects of bosentan on quality of life, survival, safety and tolerability in pulmonary arterial hypertension related to connective tissue diseases	2008	Prospective single-arm trial, conducted in 23 centres in 8 European countries	UK	Not specified	WHO class, clinical worsening, quality of life (week 16 and 48) and survival (week 48 only). Safety and tolerability were monitored throughout the study.	Not specified	Short-Form Health Survey-36 (SF-36) and health assessment questionnaire (HAQ) modified for scleroderma	At week 48, WHO class improved in 27% of patients (95% CI 16–42%) and worsened in 16% (95% CI 7–29%). Kaplan–Meier estimates were 68% (95% CI 55–82%) for absence of clinical worsening and 92% (95% CI 85–100%) for survival. Overall changes in quality of life were minimal. There were no unexpected side effects observed during the study.	Not specified	No Evidence of PRO Impact
Increased range and adoption of evidence-based treatments for refractory moderate-to-severe atopic eczema	Newcastle University	Clinical Medicine	Azathioprine dosed by thiopurine methyltransferase activity for moderate-to-severe atopic eczema: a double-blind, randomised controlled trial	2006	Parallel-group, double-blind, placebo-controlled trial	UK	Not specified	Change in disease activity from baseline to 12 weeks	Itch score, body area affected, quality of life, loss of sleep due to eczema, soluble CD30	SASSAD (six area six sign atopic dermatitis) and dermatology life quality index (DLQI)	At week 12, there was a 37% (12·0 unit) improvement in mean disease activity with azathioprine compared with a 20% (6·6 unit) improvement with placebo (17% [5·4 unit] difference, 95% CI 4·3–29%). This finding was accompanied by significant improvements in patient-reported itch, area of involvement, global assessment, and quality of life.	Itch score, body area affected, quality of life (DLQI), and global response assessed by both investigator (p=0·01) and participant (p=0·05) all improved significantly with azathioprine compared with placebo. There were improvements in loss of sleep score and soluble CD30, but these failed to reach significance, with both CIs just crossing zero.	No Evidence of PRO Impact
Cognitive stimulation - an effective intervention to improve quality of life and cognition in people with mild to moderate dementia	Bangor University	Psychology, Psychiatry and Neuroscience	Efficacy of an evidence-based cognitive stimulation therapy programme for people with dementia: randomised controlled trial	2003	Single-blind, multi-centre, randomised controlled trial	UK	Not specified	Changes in cognitive function	Changes in cognitive function (short-term memory) and quality of life	Quality of Life – Alzheimer’s Disease (QL-AD), and Alzheimer's Disease Assessment Scale-Cog (ADAS-Cog)	The intervention group had significantly improved relative to the control group on the MMSE (P=0.044)	The ADAS–Cog (P=0.014) and QL – AD scales (P=0.028) in the intervention group showed a significant improvement compared to the control group	Direct PRO impact
Impact on policy and practice in the provision of cochlear implants to deaf children and adults	University of York	Psychology, Psychiatry and Neuroscience	Self-reported benefits from successive bilateral cochlear implantation in post-lingually deafened adults: randomised controlled trial	2006	Randomised controlled trial	UK	Not specified	Self-reported measure skills in spatial hearing in everyday life	Not specified	GHSI, HUI3, VAS, and EQ-5D	Receipt of a second implant led to improvements in self-reported abilities in spatial hearing, quality of hearing, and hearing for speech, but to generally non-significant changes in measures of quality of life. Multivariate analyses showed that positive changes in quality of life were associated with improvements in hearing, but were offset by negative changes associated with worsening tinnitus.…	Not specified	Direct PRO impact
The Whole Systems Demonstrator Study (WSD) - an evaluation of tele-assistive devices in health and social care systems, to guide the roll-out of telecare and telehealth systems in the UK Health and Social Care services	City University London	Allied Health Research	Effect of telehealth on use of secondary care and mortality: findings from the Whole System Demonstrator cluster randomised trial	2012	Pragmatic, cluster randomised controlled trial	UK	Not specified	Number of patients admitted to hospital during 12 month trial period	Mortality over 12 months, number of inpatient bed days, emergency admissions, elective admissions, outpatient attendances, and emergency department visits, as well as the notional cost of hospital activity to commissioners of care based on national tariff costs		Intervention group had a lower admission proportion within 12 month follow-up (odds ratio 0.82, 95% confidence interval 0.70 to 0.97, P=0.017)	Telehealth does not improve HRQoL for patients with chronic obstructive pulmonary disease, diabetes, or heart failure over 12 months.	No Evidence of PRO Impact
Use of non-invasive ventilation to improve survival and quality of life in patients with motor neuron disease	Newcastle University	Clinical Medicine	Effects of non-invasive ventilation on survival and quality of life in patients with amyotrophic lateral sclerosis: a randomised controlled trial	2006	Randomised controlled trial	UK	Not specified	The effect of NIV on quality of life and survival. Symptoms, lung function, and quality of life were assessed at randomisation, at 1 and 3 months, then at intervals of 3 months.	Not specified	Short-Form Health Survey-36 (SF-36), the sleep related SAQLI and the chronic respiratory disease questionnaire (CRQ)	Improvement in several measures of quality of life and a median survival benefit of 205 days (p=0·006) with maintained quality of life for most of this period. NIV improved some quality-of-life indices in those with poor bulbar function, including sym (p=0·018), but conferred no survival benefit.	NA	Direct PRO impact
Diagnostics and novel life-saving therapies for aspergillosis (FAST study)	The University of Manchester	Clinical Medicine	Randomized controlled trial of oral antifungal treatment for severe asthma with fungal sensitisation (SAFS), the FAST study	2009	Randomised controlled trial	UK	Not specified	Changes in the Asthma Quality of Life Questionnaire (AQLQ) score at 32 weeks, while evaluating the response of severe asthma with fungal sensitisation to oral itraconazole	Changes in rhinitis score, total IgE, and respiratory function	AQLQ	The improvement (95% CI) in AQLQ score was 0.85 (0.28, 1.41) in the antifungal group, compared with a -0.01 (-0.43, 0.42) change in the placebo group (P = 0.014).	Rhinitis score improved (-0.43) in the antifungal, and deteriorated (+0.17) in the placebo group (P = 0.013). Morning peak flow improved (20.8 L/minute, P = 0.028) in the antifungal group. Total serum IgE decreased in the antifungal group (-51 IU/ml) but increased in placebo group (+30 IU/ml) (P = 0.001).	No Evidence of PRO Impact
Thrombolysis for acute ischaemic stroke is effective for a wide range of patients, including those over 80 years, and improves long-term function and quality of life (IST-3)	The University of Edinburgh	Psychology, Psychiatry and Neuroscience	Effect of thrombolysis with alteplase within 6 h of acute ischaemic stroke on long-term outcomes (the third International Stroke Trial [IST-3]): 18-month follow-up of a randomised controlled tria	2013	Open-label, international, multicentre, randomised, controlled trial	UK	Not specified	The proportion of patients alive and independent with an Oxford handicap scale score of 0–2 at 6 months	Survival, Oxford handicap scale score, health-related quality of life, overall functioning, and living circumstances.	Oxford handicap scale (OHS) and EQ-5D	391 (35·0%) of 1117 patients versus 352 (31·4%) of 1122 had an OHS score of 0–2 (adjusted odds ratio [OR] 1·28, 95% CI 1·03–1·57; p=0·024). Treatment was associated with a favourable shift in the distribution of OHS grades (adjusted common OR 1·30, 95% CI 1·10–1·55; p=0·002). The differences between the groups in visual analogue scale score and the proportion living at home were not signifi cant.	Treatment was associated with signifi cant improvements in mobility, self-care, ability to do usual activities, and pain or discomfort, with no evidence of an effect on anxiety or depression. Treatment was also associated with a gain in health-related quality of life that was significant for four of the five dimensions of the EQ-5D and the overall EQ utility index.	Direct PRO impact
Detailed analysis of trial of lapatinib in combination with capecitabine in advanced, HER2+ breast cancer leads to marketing authorisation worldwide	The University of Edinburgh	Clinical Medicine	A phase III randomized comparison of lapatinib plus capecitabine versus capecitabine alone in women with advanced breast cancer that has progressed on trastuzumab: updated efficacy and biomarker analyses	2008	Phase III randomised controlled trial	International	Phase III	Time-to-progession (TTP)	Progression-free survival (PFS), overall survival (OS), overall response rate, clinical benefit rate, and safety as measured by the National Cancer Institute’s Common Terminology Criteria for Adverse Events	NA	A total of 184 TTP events were identified by independent review (82 in the combination-therapy group and 102 in the monotherapy group); the corresponding HR was 0.57 (95% CI, 0.43–0.77; P < 0.001), demonstrating a significant reduction in the relative risk of progression when lapatinib is added to capecitabine therapy. This corresponded to an improvement in median TTP from 4.3 to 6.2 months	Consistent results were seen for PFS; HR was 0.55 (95% CI, 0.4–0.74; P < 0.001). The HR for PFS for the combination relative to monotherapy in the 117 patients who initiated protocol therapy within 8 weeks from the last dose of trastuzumab was 0.59 (95% CI, 0.40–0.86) compared with 0.56 (95% CI, 0.35–0.91) in the 79 patients who began protocol therapy greater than 8 weeks from the last dose of tr…	No Evidence of PRO Impact
Improving outcome measurement in pulmonary and cardiac rehabilitation	Coventry University	Allied Health Professions, Dentistry, Nursing and Pharmacy	Can low risk cardiac patients be ‘fast tracked’ to Phase IV community exercise schemes for cardiac rehabilitation? A randomised controlled tria	2011	Single blinded randomised controlled trial	UK	Phase III	Incremental Shuttle Walking Test	HRQoL (SF36) and the MacNew quality of life after myocardial infarction questionnaire. Additionally, blood pressure, BMI and dietary habits were captured	MacNew and Short-Form Health Survey-36 (SF-36)	ISWT distance statistically significantly increased over time (f = 26.80, p < 0.001) for both groups. Participats undertaking Phase IV showed an improvent compared to no-natendees (mean difference 40.38 m, 95%CI 4.20 to 76.57, p = 0.03).	HRQoL showed improvements over time (p<0.05)	No Evidence of PRO Impact
Evidence-based identification and cost-effective treatment of depression in cancer patients - Symptom Management Research Trial (SMaRT)	The University of Edinburgh	Psychology, Psychiatry and Neuroscience	Management of depression for people with cancer (SMaRT oncology 1): a randomised trial	2008	Randomised trial	UK	Not specified	Difference in mean score on Symptom Checklist-20 (SCL-20) depression scale at 3 months among patients allocated in usual care	Response to treatment, remission and SCL-20 depression score at 6 and 12 months' follow-up. Addtionally, anxiety, pain, fatigue, and physical functioning; and quality of life were measured	Symptom Checklist-20 (SCL-20) depression scale. Anxiety - a ten-item subscale of the SCL-90 questionnaire. Pain, fatigue, and physical functioning - EORTC QLQ C30 and quality of life - EQ-5D	The adjusted difference in mean score on SCL-20 was 0·34 (95% CI 0·13–0·55). In other words, the intervention improved the symptoms of depression	The intervention group showed improved anxiety and fatigue but not improvement in pain or physical functioning.	Indirect PRO impact
Lung cancer research at UCL/UCLH sets standards of care	University College London	Clinical Medicine	Comparison of gemcitabine and carboplatin versus cisplatin and etoposide for patients with poor-prognosis small cell lung cancer	2009	Multi-centre randomised trial	UK	Phase III	Overall survival	Progression-free survival, tumour response, toxicity and quality of life	EORTC QLQ-C30 questionnaire, lung cancer module LC-17 and LLCG daily diary card (DDC)	There was no difference in overall survival (HR 1.01, 95% CI 0.77 to 1.32)	Median progression-free survival was 5.9 months with GC and 6.3 months with PE. Grade 3 or 4 myelosuppressions were more frequent with GC (anaemia: 14% GC vs 2% PE; leucopenia: 32% GC vs 13% PE; thrombocytopenia: 22% GC vs 4% PE), but these were not associated with increased hospital admissions, infections or fatalities. Grade 2–3 alopecia (68% PE vs 17% GC) and nausea (43% PE vs 26% GC) were mor…	No evidence of PRO Impact
A safer and shorter treatment for thyroid cancer (HiLo trial)	University College London	Clinical Medicine	Ablation with Low-Dose Radioiodine and Thyrotropin Alfa in Thyroid Cancer	2012	Randomised noninferiority trial	UK	Phase III	The success rate for ablation at 6 and 9 months, comparing low-dose and high-dose radioiodine, each in combination with either thyrotropin alfa or thyroid hormone withdrawal before ablation	The number of days of hospitalization; adverse events during ablation and 3 months after ablation, tumor recurrence, quality of life, and socioeconomic factors	Short-Form Health Survey-36 (SF-36)	Low-dose radioiodine plus thyrotropin alfa was as effective as high-dose radioiodine, with a lower rate of adverse events.	More patients in the high-dose group than in the low-dose group were hospitalized for at least 3 days (36.3% vs. 13.0%, P<0.001). The proportions of patients with adverse events were 21% in the low-dose group versus 33% in the high-dose group (P=0.007) and 23% in the thyrotropin alfa group versus 30% in the group undergoing thyroid hormone withdrawal (P=0.11)There were no significant differences …	Indirect PRO impact
Establishing the evidence for treatment to improve outcomes in patients with lung cancer	The University of Manchester	Clinical Medicine	Phase III trial of gemcitabine and carboplatin versus mitomycin, ifosfamide, and cisplatin or mitomycin, vinblastine, and cisplatin in patients with advanced nonsmall cell lung carcinoma	2003	Randomised Phase III trial	UK	Phase III	Difference in survival between gemcitabine and carboplatin (GC) with mitomycin, ifosfamide, and cisplatin (MIC) AND mitomycin, vinblastine, and cisplatin (MVP)	Time to disease progression, response rates, toxicity, disease-related symptoms, World Health Organization performance status (PS), and quality of life	EORTC QLQ-C30 scale and the HADS depression scale	There was no significant difference in median survival between the arms	Nonhematologic toxicity was comparable for patients with Grade 3–4 symptoms, except there was more alopecia among patients in the MIC/MVP arm. GC appeared to produce more hematologic toxicity and necessitated more transfusions. There was no difference in performance status, disease-related symptoms, or QoL between patients in the two treatment arms. Fewer inpatient stays for complications were re…	No evidence of PRO Impact
Improving patient care experience and staff well-being: The application of novel methodological advances (PRaCTICAL study)	University of Dundee	Allied Health Professions, Dentistry, Nursing and Pharmacy	The PRaCTICaL study of nurse led, intensive care follow-up programmes for improving long term outcomes from critical illness: a pragmatic randomised controlled trial	2009	Pragmatic, non-blinded, multicentre, randomised controlled trial	UK	Not specified	Health related quality of life at 12 months after randomisation	HRQoL at six months, quality adjusted life years (QALYs) at 12 months, incidence and severity of post-traumatic stress disorder, and anxiety and depression at six and 12 months, cost effectiveness at 12 months, primary and secondary healthcare costs in the year after hospital discharge, and mortality in the 12 months after discharge	Short-Form Health Survey-36 (SF-36), Davidson truama score (incidence and severity of post-traumatic stress disorder) and HADS questionnaire (anxiety and depression)	At 12 months, there was no evidence of a difference in the SF-36 physical component score (mean 42.0 (SD 10.6) v 40.8 (SD 11.9), effect size 1.1 (95% CI −1.9 to 4.2), P=0.46) or the SF-36 mental component score (effect size 0.4 (−3.0 to 3.7), P=0.83).	There were no statistically significant differences in secondary outcomes or subgroup analyses. Follow-up programmes were significantly more costly than standard care and are unlikely to be considered cost effective.	No Evidence of PRO Impact
Tocilizumab - a new treatment for Rheumatoid Arthritis in adults and Juvenile Idiopathic Arthritis in children	University College London	Clinical Medicine	Therapeutic benefit of blocking interleukin‐6 activity with an anti–interleukin‐6 receptor monoclonal antibody in rheumatoid arthritis: A randomized, double‐blind, placebo‐controlled, dose‐escalation trial	2002	Randomised, double-blind, placebo-controlled, dose-escalation trial	International	Phase III	The proportion of patients who had a JIA ACR 30 response	Percentage of Participants With JIA Core Set ACR 30/50/70/90 Response at Week 12; Physician's Global Assessment of Disease Activity; Parent/Patient Global Assessment of Overall Well-being; Maximum Number of Joints With Active Arthritis; Number of Joints With Limitation of Movement; Erythrocyte Sedimentation Rate; Childhood Health Assessment Questionnaire Disability Index [...]	Disability Index of the Childhood Health Assessment Questionnaire [CHAQ-DI],	At week 12, significantly more patients who received tocilizumab than those who received placebo met the primary outcome of a JIA ACR 30 response and an absence of fever (85% vs. 24%, P<0.001)	All 22 predefined secondary end points reached statistical significance. Significantly more patients in the tocilizumab group than in the placebo group had a JIA ACR 70 response (71% vs. 8%, P<0.001) or a JIA ACR 90 response (37% vs. 5%, P<0.001). Systemic symptoms (fever and rash) and laboratory abnormalities (anemia, thrombocytosis, and hyperferritinemia) significantly improved with tocilizumab.	Direct PRO impact
Influencing national policy to improve service delivery and patient care in gastroenterology (MINuET trial)	Swansea University	Allied Health Professions, Dentistry, Nursing and Pharmacy	Open access follow up for inflammatory bowel disease: pragmatic randomised trial and cost effectiveness study	2000	Pragmatic randomised controlled trial.	UK	Not specified	Gastrointestinal symptoms	Quality of life, patient satisfaction, anxiety, cost-effectiveness, immediate and delayed complications, quality of examination by blinded assessment of endoscopic video recordings, quality of procedure reports, patients’ preferences for operator 1 year after endoscopy, and new diagnoses at 1 year.	Gastrointestinal Symptom Rating Questionnaire (GSRQ), EQ-5D, Gastrointestinal Endoscopy Satisfaction Questionnaire (GESQ), State-Trait Anxiety Inventory (STAI)	There was no significant difference between the two groups in the primary or secondary outcome measures at 1 day, 1 month or 1 year after endoscopy, with the exception of patient satisfaction at 1 day, which favoured nurses. Nurses were significantly more thorough in the examination of stomach and oesophagus, but no different from doctors in the examination of duodenum and colon.	There was no significant difference in costs to the NHS or patients, although doctors cost slightly more. Although quality of life measures showed improvement in some scores in the doctor group, this did not reach traditional levels of statistical significance.	No Evidence of PRO Impact
Targeted intraoperative radiotherapy at the time of lumpectomy for patients with early breast cancer as an alternative to conventional 3-6 weeks of postoperative radiotherapy (TARGIT-A trial)	University College London	Clinical Medicine	Targeted intraoperative radiotherapy versus whole breast radiotherapy for breast cancer (TARGIT-A trial): an international, prospective, randomised, non-inferiority phase 3 trial	2010	Randomised, non-inferiority trial	UK	Phase III	Local breast carcinoma recurrence in the conserved breast, comparing intraoperative radiotherapy with conventional policy of whole breast external beam radiotherapy	Local toxicity or morbidity, which was assessed with a pre-specified checklist with the following elements: haematoma, seroma, wound infection, skin breakdown, delayed wound healing, Radiation Therapy Oncology Group (RTOG version 2.0) toxicity grade 3 or 4 for dermatitis, telangiectasia, pain in irradiated field, or other	NA	At 4 years, there were six local recurrences in the intraoperative radiotherapy group and five in the external beam radiotherapy group. The Kaplan-Meier estimate of local recurrence in the conserved breast at 4 years was 1·20% (95% CI 0·53–2·71) in the targeted intraoperative radiotherapy and 0·95% (0·39–2·31) in the external beam radiotherapy group (difference between groups 0·25%, –1·04 to 1·54…	The frequency of any complications and major toxicity was similar in the two groups (for major toxicity, targeted intraoperative radiotherapy, 37 [3·3%] of 1113 vs external beam radiotherapy, 44 [3·9%] of 1119; p=0·44). Radiotherapy toxicity (Radiation Therapy Oncology Group grade 3) was lower in the targeted intraoperative radiotherapy group (six patients [0·5%]) than in the external beam radiot…	No Evidence of PRO Impact
Establishing an evidence-based therapeutic approach to ANCA-associated vasculitis	University of Cambridge	Clinical Medicine	Mycophenolate mofetil vs. azathioprine for remission maintenance in antineutrophil cytoplasmic antibody-associated vasculitis: a randomized controlled tria	2010	Open-label randomized controlled trial	International	Phase III	Sustained remission and rates of severe adverse events at 12 months. Death and malignant conditions occuring after 12 months	Time to remission, change in the BVAS between 0 and 3 months, change in the GFR, prednisolone dose, quality of life, and score on the Vasculitis Damage Index (scores for this index range from 0 to 64, with higher scores indicating more severe damage) between 0 and 12 months.	Short-Form Health Survey-36 (SF-36	Sustained remission occurred in 25 of 33 patients in the rituximab group (76%) and 9 of 11 patients in the control group (82%). The absolute difference in sustained remission with rituximab as compared with cyclophosphamide was –6 percentage points (95% CI, –33 to 21; P=0.68). Six patients in the rituximab group and 1 patient in the control group died within the first 12 months. Among the patient…	The median change in the score on the Vasculitis Damage Index did not differ significantly between the two treatment groups; the score changed by 2 points (interquartile range, 0 to 3) in the rituximab group and by 1 point (interquartile range, 0 to 2) in the control group (P=0.38). The change in the score on the physical component of the SF-36 also did not differ significantly between the two gr…	No Evidence of PRO Impact
Preventing the gastroduodenal hazards of non-steroidal anti-inflammatory drugs and aspirin through widespread adoption of proton pump inhibitors	University of Nottingham	Clinical Medicine	Famotidine for the Prevention of Gastric and Duodenal Ulcers Caused by Nonsteroidal Antiinflammatory Drugs	1996	Double-blind, parallel-group, randomised trial	UK	Not specified	Cumulative incidence of gastric or duodenal ulceration at 24 weeks	Lanza scores for lesser degrees of gastroduodenal injury, abdominal pain, pain scores, and antacid consumption	Health Assessment Questionnaire	The cumulative incidence of gastric ulcers was 20 percent in the placebo group, 13 percent in the group of patients receiving 20 mg of famotidine twice daily (P0.24 for the comparison with placebo), and 8 percent in the group receiving 40 mg of famotidine twice daily (P0.03 for the comparison with placebo)	Pain similar among three groups	No Evidence of PRO Impact
Threefold Increase in the Use of Anti-TNF in the Treatment of Common Chronic Inflammatory Conditions	Imperial College London	Clinical Medicine	Infliximab and Methotrexate in the Treatment of Rheumatoid Arthritis	2000	Randomised Phase III trial	UK	Not specified	Clinical responses with use of the criteria of the American College of Rheumatology, the quality of life with a health-status questionnaire, and the effect on joint damage radiographically	Not specified	Short-Form Health Survey-36 (SF-36)	Reduction in the symptoms and signs of rheumatoid arthritis that was significantly greater than the reduction associated with methotrexate therapy alone (clinical response, 51.8 percent vs. 17.0 percent; P<0.001). The quality of life was also significantly better with infliximab plus methotrexate than with methotrexate alone. Radiographic evidence of joint damage increased in the group given meth…	NA	No Evidence of PRO Impact
Improving tolerability, convenience and cost of bowel cancer chemotherapy	University of Glasgow	Clinical Medicine	Capecitabine as adjuvant treatment for stage III colon cancer.	2005	Randomised Phase III trial	UK	Phase III	Equivalence in disease-free survival between capecitabine and bolus fluorouracil plus leucovorin	Relapse-free survival, overall survival, safety and quality of life	The Quality of Life Questionnaire (QLQ-C30)	Disease-free survival in the capecitabine group was at least equivalent to that in the fluorouracil-plus-leucovorin group (in the intention-to-treat analysis	Capecitabine improved relapse-free survival (hazard ratio, 0.86; 95 percent confidence interval, 0.74 to 0.99; P=0.04) and was associated with significantly fewer adverse events than fluorouracil plus leucovorin (P<0.001). In the two groups, the scores remained relatively constant over time. However, at week 25 of treatment, the mean scores for global health status in the two groups showed simila…	Indirect PRO impact
Cognitive Stimulation Therapy - a new therapy for dementia	University College London	Psychology, Psychiatry and Neuroscience	Efficacy of an evidence-based cognitive stimulation therapy programme for people with dementia: Randomised controlled trial	2003	Single-blind, multi-centre, randomised Phase III controlled trial	International	Not specified	Changes in cognitive function	Changes in cognitive function (short-term memory) and quality of life	Quality of Life – Alzheimer’s Disease (QL-AD), and Alzheimer’s Disease Assessment Scale – Cognition (ADAS-Cog)	The intervention group had significantly improved relative to the control group on the MMSE (P=0.044)	The ADAS–Cog (P=0.014) and QL–AD scales (P=0.028) in the intervention group showed a significant improvement compared to the control group	Direct PRO impact
Mood Disorders Centre – Improving Psychological Treatments for Depression	University of Exeter	Psychology, Psychiatry and Neuroscience	Rumination-focused cognitive behaviour therapy for residual depression: phase II randomized controlled trial.	2011	Phase II randomised controlled trial	UK	Phase II	Severity of residual depressive symptoms	Rumination-focused CBT reduces rumination significantly more than treatment as usual	Beck Depression Inventory, Ruminative Response Scale of the Response Styles Questionnaire	The rumination-focused CBT group reported significantly fewer residual depressive symptoms postintervention compared with the treatment as usual group, after covarying initial level of baseline symptoms, for both BDI-II and HRSD	Depressive rumination post-intervention, covarying for baseline levels, was significantly lower in the ruminationfocused CBT group than the TAU group	No Evidence of PRO Impact
Natalizumab: a potent treatment for highly active relapsing-remitting multiple sclerosis (AFFIRM study)	University College London	Psychology, Psychiatry and Neuroscience	A controlled trial of natalizumab for relapsing multiple sclerosis	2003	Randomised double-blind trial	UK	Not specified	The number of new gadolinium-enhancing lesions over the six-month treatment period, defined as the period following the first infusion (month 1) to one month after the last infusion (month 6)	The frequency of relapse, changes in the scores on the Kurtzke Expanded Disability Status Scale, and patients' own assessments of well-being.	Visual-analogue scale	The placebo group had a mean of 9.6 new gadolinium-enhancing lesions per patient during the treatment period. The corresponding means were 0.7 in the group given 3 mg of natalizumab per kilogram (P<0.001) and 1.1 in the group given 6 mg of natalizumab per kilogram (P<0.001). There was no significant difference in values between the two natalizumab groups.	There was a marked reduction in the number of persistent enhancing lesions, the number of new active lesions, the total volume of enhancing lesions, and the percentage of scans showing activity in each natalizumab group as compared with the placebo group. The visual-analogue scores of well-being at month 6 were compared with base-line scores. The placebo group reported a slight worsening (mean de…	No Evidence of PRO Impact
Reducing blood transfusions in intensive care and surgery saves precious blood, reduces costs and decreases patient risk	The University of Edinburgh	Clinical Medicine	Restrictive versus liberal transfusion strategies for older mechanically ventilated critically ill patients: a randomized pilot trial	2013	Parallel-group randomized multicenter pilot trial.	UK	Pilot trial	Mean difference in hemoglobin concentration (Hb) at 14 days and RBC (at 60 days)	Mortality (at 30, 60, and 180 days); antibiotic-and ventilation-free during 60 days follow-up; prevalence of predefined adverse events; HRQoL and physical function at 60 and 180 days postrandomisation	SF-12 and Rivermead Mobility Index (RMI) questionnaires	The Hb difference among groups was 13.8g/L (95% CI,11.5-16.0 g/L), p<0.0001); mean Hb during intervention was 81.9 vs 95.7 g/L	Mortality at 180 days postrandomisation was higher in the liberal group (55%) compared to the restricitive group (37%); relative risk was 0.68 (95% CI, 0.44-1.05; p=0.073). RMI and SF-12 showed severe functional impairment and reduced HRQoL ar 60 days. At 180 days, there were not no statistically significant differences in RMI or SF-12 physical function component scores. The mental component scor…	No Evidence of PRO Impact
Innovations in the treatment of chronic myeloid leukemia have almost doubled 5-year survival rates.	Newcastle University	Clinical Medicine	Imatinib Compared with Interferon and Low-Dose Cytarabine for Newly Diagnosed Chronic-Phase Chronic Myeloid Leukemia	2003	Prospective, multicenter, open-label, phase 3, randomized, controlled trial	International	Phase III	Progression under imatinib or interferon alfa plus low-dose cytarabine treatment	The rate of complete hematologic response, the rate of major cytogenetic response, safety and tolerabily	NA	At 18 months, the estimated rate of freedom from progression to accelerated-phase or blast-crisis CML was 96.7% in the imatinib group and 91.5% in the combination-therapy group (P<0.001). Imatinib was better tolerated than combination therapy	After a median follow-up of 19 months, the estimated rate of a major cytogenetic response at 18 months was 87.1% (95% Cl, 84.1 to 90.0) in the imatinib group and 34.7% (95% CI, 29.3 to 40.0) in the group given interferon alfa plus cytarabine (P<0.001). The estimated rates of complete cytogenetic response were 76.2% (95% CI, 72.5 to 79.9) and 14.5% (95% CI, 10.5 to 18.5), respectively (P<0.001)	No Evidence of PRO Impact
Transforming Treatment for Balance Disorders: Booklet-Based Balance Retraining	University of Southampton	Psychology, Psychiatry and Neuroscience	Effectiveness of nurse-delivered vestibular rehabilitation for chronic dizziness in primary care: a randomized controlled trial	2004	Single-blind randomized, controlled trial.	UK	Not specified	Self-reported spontaneous and provoked symptoms of dizziness, dizziness-related quality of life, and objective measurement of postural stability with eyes open and eyes closed at 3 and 6 months	Anxiety, depression and physical functioning	Vertigo Symptom Scale–Short Form, Dizziness Handicap Inventory, Hospital Anxiety and Depression Scale (HADS) and Short-Form Health Survey-36 (SF-36)	At 3 months, all the primary outcomes presented a significant imporvement in the vestibular rehabilitation group compared to usual care; this improvement was maintained at 6 months. Of 83 treated patients, 56 (67%) reported clinically significant improvement compared with 33 of 87 (38%) usual care patients (relative risk, 1.78 [95% CI, 1.31 to 2.42])	Secondary outcomes did not present significant changes between both groups. At six months, physical functioning presented a decrease	No Evidence of PRO Impact
Enhancing quality of life after acquired brain injury	Goldsmiths, University of London	Psychology, Psychiatry and Neuroscience	Community-based rehabilitation after TBI: A randomised controlled trial	2002	Randomised controlled trial	UK	Not specified	Comparison of outreach treatment in community settings	Functional independence (disability); and anxiety and depression in a subgroup of patients	The brain injury community rehabilitation outcome-39 (BICRO-39), the functional independence/assessment measure (FIM+FAM), the hospital anxiety and depression scale (HADS)	Outreach participants were showed significant improvements in the BI and the BICRO-39 total score and self organisation and psychological wellbeing subscales	Total FIM+FAM scores had similar improvement in both groups (mean ranks: outreach 46.5, information 47.4; U=1058.5, NS). However, the maximum gain index was higher in the outreach group. The HADS index did not show a change (71% fell into the normal range for anxiety and 65% for depression, and in both cases only 15% of participants scored above 13) between groups from intake to follow up for eit…	No Evidence of PRO Impact
Improving outcomes for people with cystic fibrosis through evidence based clinical trials	Queen’s University Belfast	Clinical Medicine	A CFTR potentiator in patients with cystic fibrosis and the G551D mutation	2011	Randomised, double-blind, placebo-controlled trial	International	Phase III	The primary efficacy end point was the absolute change from baseline through week 24 in the percent of predicted FEV1.	The change from baseline through week 48 in the percent of predicted FEV1; the time to the first pulmonary exacerbation14 through week 24 and week 48; subject-reported respiratory symptoms through week 24 and week 48, as assessed with the use of the respiratory domain of the Cystic Fibrosis Questionnaire–revised (CFQ-R)15; the change in weight from baseline to week 24 and week 48; and the change …	Cystic Fibrosis Questionnaire–revised (CFQ-R)	Through week 24, there was an increase from baseline of 10.4 percentage points in the percent of predicted FEV1 in the ivacaftor group, as compared with a decrease of 0.2 percentage points in the placebo group — a treatment effect of 10.6 percentage points (P<0.001)	Subjects treated with ivacaftor, as compared with those receiving placebo, had an improvement in scores on the CFQ-R respiratory domain (indicating a reduction in respiratory symptoms). From baseline to week 48, the scores increased by 5.9 points in the ivacaftor group, as compared with a decrease of 2.7 points in the placebo group (treatment effect, 8.6 points; P<0.001).	Direct PRO impact
Cataract Surgery – Quality of Life Benefits and Improved Access to Treatment in the UK and beyond	University of Bristol	Public Health, Health Services and Primary Care	Randomised trial of effectiveness of second eye cataract surgery	1998	Randomised controlled trial	UK	Not specified	The effects of second eye surgery in terms of patient perceptions as well as through visual acuity, contrast sensitivity, and stereoacuity tests	Health status	PRO tool does not have an assigned name within the trial. From 2003 the PRO instrument is known as Visual Symptoms and Quality Life (VSQ) Short-Form Health Survey-36 (SF-36)	ifferences in self-reported vision related difficulties between the two groups ranged from 11% (95% CI 4·4–17%, activities) to 30% (19–41%, reading). Stereoacuity was better in the expedited surgery group, the difference between the groups for the proportions with stereoacuity of 3000 s of arc or worse was 58% (47–69%).	There were no significant differences for any of the three reading speed assessments. Analysis of covariance led to no significant differences for any of the eight SF-36 health-profile dimensions. In all cases in which significance was attained, the difference was in favour of the expedited-surgery group.	No Evidence of PRO Impact
Improving clinical decision making and patient outcomes in severe limb ischaemia (BASIL trial)	University of Birmingham	Clinical Medicine	Bypass versus Angioplasty in Severe Ischaemia of the Leg (BASIL) trial: Analysis of amputation free and overall survival by treatment received	2010	Multi-centre randomised trial	UK	Not specified	To determine amputation-free survival (AFS) while comparing 'bypass-surgery-first' with a 'balloon-angioplasty-first' revascularisation strategy in patients with severe limb ischaemia (SLI) due to infrainguinal disease requiring immediate/early revascularisation	Overall survival (OS), health-related quality of life (HRQoL) and cost-effective use of hospital resources.	EQ-5D and the Short-Form Health Survey-36 (SF-36), used along with theVascular Quality of Life Questionnaire-6 (VascuQoL)	AFS at 1 and 3 years was not significantly different for surgery and angioplasty. Considering the follow-up period as a whole, AFS and OS did not differ between treatments but for patients surviving beyond 2 years from randomisation, bypass was associated with reduced HRs for AFS (HR 0.85; 95% CI 0.50 to 1.07; p = 0.108) and OS (HR 0.61; 95% CI 0.50 to 0.75; p = 0.009), equating to an increase in…	HRQoL was non-significantly better in the surgery group; amputation was associated with a significant reduction in HRQoL. Over the first year, hospital costs for bypass were significantly higher (difference 5420 pounds; 95% CI 1547 pounds to 9294 pounds) than for angioplasty. However, by 3 and at 7 years the differences in cost between the two strategies were no longer significant. Patients rando…	No Evidence of PRO Impact
Personalising asthma care for children	University of Brighton	Allied Health Professions, Dentistry, Nursing and Pharmacy	Tailored second-line therapy in asthmatic children with the Arg(16) genotype	2013	Pragmatic randomised controlled trial, open-label	UK	Not specified	School absence over a year, while receiving salmeterol (50 μg, b.i.d.) or montelukast (5 or 10 mg, once daily) plus inhaled fluticasone for 1 year	Asthma-related hospitalizations, requirement of courses of oral steroids, total asthma exacerbations, the use of inhaled bronchodilator as reliever, daily asthma symptoms as reported by the participants, quality of life and spirometry	Paediatric Asthma Quality of Life Questionnaire (PAQLQ)	School absences were reduced with montelukast, difference in score= −0.40 (95% CI −0.22 to −0.58]; P=0.005). Salbutamol use was also reduced with montelukast compared with salmeterol [difference in score=−0.47 (95% CI, −0.16 to −0.79); P<0.0001].	Quality of life and symptoms scores presented an improvement in the montelukast intervention group. There was no difference in FEV1 (forced expiratory volume in 1 s).	No Evidence of PRO Impact
Better diagnosis and treatment for patients with myeloproliferative neoplasms (COMFORT II trial)	King's College London	Clinical Medicine	AK inhibition with ruxolitinib versus best available therapy for myelofibrosis	2012	Open label, randomised controlled trial	UK	Phase III	Reduction of 35% or more in spleen volume at week 48	Reduction of 35% or more in spleen at week 24. The length of time that a reduction in spleen volume of at least 35% was maintained, the time to a reduction in spleen volume of 35% or more, progression-free survival, leukemia-free survival, overall survival, and change in marrow histomorphologic features.	QLQ-C30 and the Functional Assessment of Cancer Therapy–Lymphoma (FACT-Lym) scale	At week 48, 28% of the patients in the intervention group had at least a 35% reduction in spleen volume, compared to 0% in the usual care group (P<0.001)	At week 24, 32% of the patients in the intervention group had at least a 35% reduction in spleen volume compared to 0% in the usual care group (P<0.001). Patients in the ruxolitinib group had an improvement in overall quality of life and a reduction in symptoms associated with myelofibrosis	Indirect PRO impact
Novel treatment for psoriatic arthritis receives regulatory approval (PSUMMIT 1 trial)	University of Glasgow	Clinical Medicine	Golimumab, a new human tumor necrosis factor alpha antibody, administered every four weeks as a subcutaneous injection in psoriatic arthritis: Twenty-four-week efficacy and safety results of a randomized, placebo-controlled study	2009	Multicenter, randomised, double‐blind, placebo‐controlled trial	International	Phase III	Proportion of patients with at least 20% improvement in ACR response criteria (ACR20) at week 24	Change in scores on the Health Assessment Questionnaire Disability Index (HAQ-DI), the proportion of patients achieving at least 75% improvement in the psoriasis area severity index, at least 50% improvement in ACR response criteria (ACR50), and at least 70% improvement in ACR response criteria (ACR70) at week 24	HAQ-DI	More ustekinumab-treated (87 of 205 [42·4%] in the 45 mg group and 101 of 204 [49·5%] in the 90 mg group) than placebo-treated (47 of 206 [22·8%]) patients achieved ACR20 at week 24 (p<0·0001 for both comparisons); responses were maintained at week 52. At week 16, proportions of patients with adverse events were similar in the ustekinumab and placebo groups (171 of 409 [41·8%] vs 86 of 205 [42·0%…	Overall median HAQ-DI score was 1·3 (IQR 0·8–1·8) and serum CRP concentration 10·3 mg/L (6·0–20·7).	Direct PRO impact
Systemic therapies for ovarian cance	University of Glasgow	Clinical Medicine	Phase III randomized trial of docetaxel-carboplatin versus paclitaxelcarboplatin as first-line chemotherapy for ovarian carcinoma.	2004	Phase III Randomised Contorlled Trial	UK	Phase III	Progression-free survival while comparing the combination of docetaxel–carboplatin with the combination of paclitaxel–carboplatin in women with ovarian cancer	Global health status, functional scales, symptom scales, and neurotoxicity score (NScore)	European Organisation for Research and Treatment of Cancer (EORTC) core questionnaire QLQ-C30, and EORTC QLQ-OV28	The progression-free survival median was 23 months, and 98% of living patients had a minimum 1 year's follow-up. The median progression-free survival for the docetaxel–carboplatin arm was 15 months (95% CI = 13.3 to 16.6) and for the paclitaxel–carboplatin arm was 14.8 months (95% CI = 13.5 to 16.1)	Treatment with docetaxel–carboplatin was associated with statistically significantly lower incidences of neurosensory (45% versus 78%; P <.001) and neuromotor (9% versus 16%; P = .001) toxicity than treatment with paclitaxel–carboplatin. Quality of life scores did not differ between treatment arms during either therapy or follow-up, with scores increasing from baseline in both arms. For neurotoxi…	No Evidence of PRO Impact
Stroke Units: Research driven excellence in quality stroke care	King's College London	Psychology, Psychiatry and Neuroscience	Training care givers of stroke patients: Randomised controlled trial	2004	Single blind, randomised controlled trial.	UK	Not specified	Cost to health and social services, caregiving burden, patients' and care givers' functional status, psychological state, quality of life and patients' institutionalisation or mortality at one year	Not specified	Frenchay activities index (FAI), hospital anxiety and depression score (HADS), EQ-5D	The costs of care over one year for patients whose care givers had received training were significantly lower (£10 133 vs £13 794; P = 0.001). Trained care givers experienced less caregiving burden (care giver burden score 32 vs 41; P = 0.0001), anxiety (anxiety score 3 vs 4; P = 0.0001) or depression (depression score 2 vs 3; P = 0.0001) and had a higher quality of life (EuroQol score 80 vs 70; …	Not specified	Indirect PRO impact
Developing and disseminating conformal radiotherapy and intensity modulated radiotherapy (PARSPORT trial)	The Institute of Cancer Research	Clinical Medicine	Parotid-sparing intensity modulated versus conventional radiotherapy in head and neck cancer (PARSPORT): a phase 3 multicentre randomised controlled trial	2011	Multi-centred randomised controlled trial	UK	Phase III	The proportion of patients with xerostomia of grade 2 or worse by the LENT SOMA subjective side-effect scale 1 year after treatment	The proportion of patients with any measurable salivary flow after radiotherapy, acute and other late radiation side-effects, QoL that included xerostomia-related QoL as measured by the modified xerostomia questionnaire, locoregional progression-free survival (PFS), and overall survival	QLQC30 instrument, the associated head and neck specific module HN35 and the modified xerostomia questionnaire	At 12 months xerostomia side-effects were reported in 73 of 82 alive patients; grade 2 or worse xerostomia at 12 months was significantly lower in the IMRT group than in the conventional radiotherapy group (25 [74%; 95% CI 56–87] of 34 patients given conventional radiotherapy vs 15 [38%; 23–55] of 39 given IMRT, p=0·0027).	At 24 months, grade 2 or worse xerostomia was significantly less common with IMRT than with conventional radiotherapy (20 [83%; 95% CI 63–95] of 24 patients given conventional radiotherapy vs nine [29%; 14–48] of 31 given IMRT; p<0·0001). At 12 and 24 months, significant benefits were seen in recovery of saliva secretion with IMRT compared with conventional radiotherapy, as were clinically signif…	No Evidence of PRO Impact
Change in practice of stroke practitioners due to the Bridges stroke self-management programme	Kingston University	Allied Health Professions, Dentistry, Nursing and Pharmacy	Bridges self-management programme for people with stroke in the community: feasibility randomised controlled trial.	2015	Feasibility randomised controlled trial	UK	Feasibility trial	Health-related quality of life and self-efficacy	Functional independence, activity, mood and community integration	EQ-5D and SSQOL instruments	Participants who received the Bridges stroke self-management program presented a greater change in self-efficacy and quality of life over the six-week intervention period. Quality of life had a reduction at 3 months follow-up	The control group had an improvement in functional activity, social integration over the six-week intervention period. The mood score showed an decrease at three-month follow-up	No Evidence of PRO Impact
Lower risks to patients, advances in international practice and substantial resource savings result from ‘beating heart’ off-pump coronary artery bypass surgery (BHACAS 1 and 2 trials)	University of Bristol	Clinical Medicine	Early and mid-term outcome after off-pump and on-pump surgery in Beating Heart Against Cardioplegic Arrest Studies (BHACAS 1 and 2): a pooled analysis of two randomised controlled trials	2002	Randomised controlled trial	UK	Not specified	All-cause mortality or a cardiac-related event at midterm follow-up (1–3 years)	Not speficied	NA	Off-pump coronary surgery significantly lowers in-hospital morbidity without compromising outcome in the first 1–3 years after surgery compared with conventional on-pump coronary surgery.	NA	No Evidence of PRO Impact
Sublingual Allergen Immunotherapy in the Treatment of Hayfever	Imperial College London	Clinical Medicine	Efficacy and safety of sublingual immunotherapy with grass allergen tablets for seasonal allergic rhinoconjunctivitis	2006	Longitudinal, double-blind, placebo-controlled, parallel-group trial	UK	Not specified	Rhinoconjunctivitis symptom score and rhinoconjunctivitis medication score as primary endpoints	Not specified	Patients rated their rhinoconjunctivitis symptoms on a scale (not named) and on a visual analog scale (VAS). Additionally, relief medication score was measured too	Patients in the control group presented 30% reduction in rhinoconjunctivitis symptom score (P < .0001) and a 38% reduction in rhinoconjunctivitis medication score (P < .0001) compared with placebo. There were no serious local side effects and no severe systemic adverse events	Not specified	No Evidence of PRO Impact
Positive Impact of Non-invasive Ventilation on Survival in Duchenne Muscular Dystrophy and Related Neuromuscular Disorders	Imperial College London	Clinical Medicine	Randomised controlled trial of non-invasive ventilation (NIV) for nocturnal hypoventilation in neuromuscular and chest wall disease patients with daytime normocapnia	2005	Randomised controlled trial	UK	Not specified	Peak TcCO2	Number of patients who met criteria to initiate NIV in the control group Changes in pulmonary function Respiratory muscle strength Quality of life	Short-Form Health Survey-36 (SF-36)	Peak nocturnal transcutaneous carbon dioxide tension (TcCO2) did not differ between the groups, but the mean (SD) percentage of the night during which TcCO2 was >6.5 kPa decreased in the NIV group (−57.7 (26.1)%) but not in controls (−11.75 (46.1)%; p = 0.049, 95% CI −91.5 to −0.35). Mean (SD) arterial oxygen saturation increased in the NIV group (+2.97 (2.57)%) but not in controls (−1.12 (2.02)%…	Compared with the control patients, a gain in the SF-36 general health score was seen in group 2 patients by 18 months (p = 0.035, 95% CI 51.35 to 2.31) but there were no changes in other domains in groups 1 and 2. In group 3, vitality and social function scores improved (p = 0.017 and p = 0.031, respectively) and there was a trend to improvement in general health (p = 0.06) and mental health	Indirect PRO impact
Managing hypoglycaemia to improve quality of life in people with diabetes (DAFNE trial)	King's College London	Allied Health Professions, Dentistry, Nursing and Pharmacy	Training in flexible, intensive insulin management to enable dietary freedom in people with type 1 diabetes: dose adjustment for normal eating (DAFNE) randomised controlled trial	2002	Randomised controlled trial	UK	Not specified	Glycated haemoglobin (HbA1c) and quality of life among patients receiving dose adjustment for normal eating (DAFNE) training or usual care	Satisfaction with treatment, psychological wellbeing, weight, blood pressure, cholesterol, triglycerides, and high density lipoprotein cholesterol. The number of insulin injections, total insulin dose, and blood glucose monitoring	Diabetes-dependent quality of life (ADDQoL) questionnaire, diabetes treatment satisfaction questionnaire (DTSQ), 12-item well-being questionnaire (W-BQ12)	At 6 months, HbA1c was significantly better in immediate DAFNE patients (mean 8.4%) than in delayed DAFNE patients (9.4%) (t=6.1, P < 0.0001). The impact of diabetes on dietary freedom was significantly improved in immediate DAFNE patients compared with delayed DAFNE patients (t= − 5.4, P < 0.0001), as was the impact of diabetes on overall quality of life (t=2.9, P < 0.01).	General wellbeing and treatment satisfaction were also significantly improved, but severe hypoglycaemia, weight, and lipids remained unchanged. Improvements in “present quality of life” did not reach significance at 6 months but were significant by 1 year	No Evidence of PRO Impact
Early pulmonary rehabilitation reduces re-admissions and improves survival of patients admitted to hospital with acute flare-ups of chronic obstructive pulmonary disease (COPD)	King's College London	Clinical Medicine	Outpatient pulmonary rehabilitation following acute exacerbations of COPD.	2010	Randomised, parallel assigment, open-label trial	UK	Phase III	Hospital re-admission rate for an exacerbation of COPD of patients treated with post-exacerbation PR (PEPR) or usual care	Physiological functioning (exercise capacity and quadriceps strength)	EQ-5D, Chronic Respiratory Disease Questionnaire (CRDQ) and St George's Respiratory Questionnaire (SGRQ)	The proportion of patients re-admitted to hospital with an exacerbation was 33% in the UC group compared with 7% in those receiving PEPR (OR 0.15, 95% CI 0.03 to 0.72, p=0.02). The proportion of patients that experienced an exacerbation resulting in an unplanned hospital attendance (either admission or review and discharge from the emergency department) was 57% in the UC group and 27% in those re…	PEPR was associated with an improved SGRQ total and activities score as well as increased CRDQ dyspnoea and emotion scores.	Indirect PRO impact
Informing the policy and implementation of screening for abdominal aortic aneurysms (AAA - MASS study)	Brunel University	Public Health, Health Services and Primary Care	The Multicentre Aneurysm Screening Study (MASS) into the effect of abdominal aortic aneurysm screening on mortality in men: a randomised controlled trial.	2002	Randomised controlled trial	UK	Not specified	Abdominal aortic aneurysm related mortality	All cause mortality, frequency of ruptured abdominal aortic aneurysm, and effect of screening and surgery on quality of life	Hospital anxiety and depression scale (HADS), Spielberger state-trait anxiety scale, Short-Form Health Survey-36 (SF-36) and the EQ-5D	There were 65 aneurysm-related deaths (absolute risk 0·19%) in the invited group, and 113 (0·33%) in the control group (risk reduction 42%, 95% CI 22–58; p=0·0002), with a 53% reduction (95% CI 30–64) in those who attended screening. 30-day mortality was 6% (24 of 414) after elective surgery for an aneurysm, and 37% (30 of 81) after emergency surgery.	All cause of moratlity and frequency of ruptured abdominal aortic aneurysm were substantially greater frequently in the group that did not attend screening. There were no differences in anxiety or depression between groups. Ther were small difference in the physical and mental subscales (EQ-5D) and self-rated health (SF-36). 12 months after screening or surgery, there were no differences between …	No Evidence of PRO Impact
A New Standard of Care for Locally Advanced Prostate Cancer	Cardiff University	Clinical Medicine	Combined androgen deprivation therapy and radiation therapy for locally advanced prostate cancer: a randomised, phase 3 trial	2011	Randomised controlled trial	International	Phase III	Overall survival in men with locally advanced prostate cancer managed with androgen deprivation therapy (ADT) and addition of radiotherapy (RT)	Disease-specific survival, time to disease progression, symptomatic local control measured, health-related quality of life (HRQoL) and toxicity	QLQ-C30 (version 3) with the PR13 prostate-specific module, or Functional Assessment of Cancer Therapy–Prostate (FACT-P)	The addition of RT to ADT improved overall survival at 7 years (74%, 95% CI 70–78 vs 66%, 60–70; hazard ratio [HR] 0·77, 95% CI 0·61–0·98, p=0·033)	Both toxicity and health-related quality-of-life results showed a small effect of RT on late gastrointestinal toxicity (rectal bleeding grade >3, three patients (0·5%) in the ADT only group, two (0·3%) in the ADT and RT group; diarrhoea grade >3, four patients (0·7%) vs eight (1·3%); urinary toxicity grade >3, 14 patients (2·3%) in both groups)	No Evidence of PRO Impact
Cardiff research yields evidence for benefits of sentinel node biopsy and spearheads training in the technique as a standard of care in breast cancer surgery (ALMANAC trial)	Cardiff University	Clinical Medicine	Randomised multicenter trial of sentinel node biopsy versus standard axillary treatment in operable breast cancer	2006	Multicenter, randomised, controlled trial	UK	Phase III	Arm and shoulder morbidity and quality of life between patients with clinically node-negative invasive breast cancer who received sentinel lymph node biopsy and patients who received standard axillary treatment	Axillary recurrence rate	Functional Assessment of Cancer Therapy-Breast + 4 questionnaire (FACT-B+4)	The relative risks of any lymphedema and sensory loss for the sentinel lymph node biopsy group compared with the standard axillary treatment group at 12 months were 0.37 (95% confidence interval [CI] = 0.23 to 0.60; absolute rates: 5% versus 13%) and 0.37 (95% CI = 0.27 to 0.50; absolute rates: 11% versus 31%), respectively. Drain usage, length of hospital stay, and time to resumption of normal d…	At 12 months after surgery, four patients in the standard treatment group and one patient in the sentinel node biopsy group had an axillary local recurrence (difference = 2.7%, 95% CI = −1.5% to 7.8%).	Indirect PRO impact
Psycho-education following trauma: Impact on international clinical guidelines and education of health professionals	University of Sheffield	Psychology, Psychiatry and Neuroscience	Effectiveness of providing self-help information following acute traumatic injury: randomised following acute traumatic injury: randomised controlled trial controlled trial	2005	Randomised controlled trial	UK	Not specified	the efficacy of We assessed the efficacy of providing such self-help information through the Post-Traumatic Diagnostic Scale (PDS)	The Hospital Anxiety and Depression Scale (HADS)	Post-Traumatic Diagnostic Scale (PDS) and Hospital Anxiety and Depression Scale (HADS)	Post-traumatic stress disorder (PTSD), anxiety and depression (PTSD), anxiety and depression decreased (decreased (P50.05) with time butthere 0.05) with time butthere were no group differencesin PTSD or were no group differencesin PTSD or anxiety.The controls wereless depressed anxiety.The controls wereless depressed (P50.05) atfollow-up.There was a 0.05) atfollow-up.There was a reductionin PTSD …		No Evidence of PRO Impact
Transforming severe asthma therapy	University of Southampton	Clinical Medicine	Efficacy and safety of a recombinant anti-immunoglobulin E antibody (omalizumab) in severe allergic asthma	2004	Randomised, double-blind, placebo-controlled trial	UK	Not specified	Percentage reduction from baseline in fluticasone dose after 32 weeks' treatment.	Absolute reduction in fluticasone dose compared to baseline, asthma exacerbation episodes (protocol defined as a worsening of asthma requiring treatment with systemic corticosteroids), use of rescue medication, asthma symptom score, peak expiratory flow (PEF) and post-bronchodilator spirometry. Daily diary cards recorded nocturnal (0–4) and daytime (0–4) asthma scores, morning asthma symptoms (ye…	Asthma Quality of Life Questionnaire (AQLQ)	Median reductions in fluticasone dose were significantly greater with omalizumab than placebo: 60% vs. 50% (P=0.003). Some 73.8% and 50.8% of patients, respectively, achieved a geqslant R: gt-or-equal, slanted50% dose reduction (P=0.001). Fluticasone dose reduction to leqslant R: less-than-or-eq, slant500 μg/day occurred in 60.3% of omalizumab recipients vs. 45.8% of placebo-treated patients (P=0…	Changes in QoL scores from baseline to the end of the corticosteroid-reduction phase of geqslant R: gt-or-equal, slanted0.5 and geqslant R: gt-or-equal, slanted1.5 were considered to be clinically detectable and large improvements in asthma-related QoL, respectively [19, 20]. Overall, 58% of patients treated with omalizumab had a clinically detectable improvement in asthma-related QoL compared to…	No Evidence of PRO Impact
Artificial cervical joint improves patient outcome, reduces healthcare costs worldwide and benefits business	University of Bristol - However the PRO trial was not carried out by the University of Bristol	Psychology, Psychiatry and Neuroscience	Long-term clinical and radiographic outcomes of cervical disc replacement with the Prestige disc: results from a prospective randomized controlled clinical trial	2010	Open-label randomized controlled trial	UK	Not specified	Clinical outcome measures, the NDI, the SF-36 PCS, neck and arm pain scores, and return-to-work status were self-administered preoperatively and at 1.5, 3, 6, 12, 24, 36, and 60 months postoperatively in patients undergoing anterior cervical surgery in which a cervical disc prosthesis was used to treat single-level degenerative cervical disc disease	Not specified	Neck Disability Index (NDI) and Short-Form Health Survey-36 (SF-36)	Significant improvements in Neck Disability Index (NDI) scores, Physical Component Summary scores of the 36-Item Short-Form Health Survey, and neck and arm pain scores were achieved by 1.5 months in both groups and sustained at 5 years. The SF-36 PCS scores improved significantly in all groups from preoperative scores by 6 months, which was the first postoperative period for SF-36 evaluation, and…		Direct PRO impact
Improving well-being and outcome for patients with heart failure using Cardiac Resynchronisation Therapy (CRT)	University of Hull	Allied Health Professions, Dentistry, Nursing and Pharmacy	The Effect of Cardiac Resynchronization on Morbidity and Mortality in Heart Failure	2005	Multicenter, international, randomised trial	UK	Phase III	Time of death from any cause or unplanned hospitalisation as a consequence of a major cardiovascular event, comparing cardiac resynchronisation vs medical therapy alone	Death from any cause, composite of death from any cause and unplanned hospitalization with heart failure. The New York Heart Association (NYHA) class and quality of life at 90 days	Minnesota Living with Heart Failure questionnaire and EQ-5D	In the cardiac-resynchronization group, 82 patients died, as compared with 120 patients who had been assigned to medical therapy alone (20 percent vs. 30 percent; hazard ratio, 0.64; 95 percent confidence interval, 0.48 to 0.85; P<0.002)	Cardiac resynchronization reduced the risk of the composite end point of death from any cause or hospitalization for worsening heart failure (hazard ratio, 0.54; 95 percent confidence interval, 0.43 to 0.68; P<0.001). Patients in the cardiac-resynchronization group had less severe symptoms (P<0.001) and a better quality of life (P<0.001) at 90 days. At 18 months, 105 of the patients in the cardia…	Indirect PRO impact
Improved clinical management of lysosomal disorder	University of Manchester	Clinical Medicine	Enzyme replacement therapy for mucopolysaccharidosis I: a randomized, double-blinded, placebo controlled, multinational study of recombinant human α-L-iduronidase (laronidase)	2004	randomised, double-blinded, multinational study	UK	Phase III	Median change from baseline to week 26 between groups in percentage of predicted normal forced vital capacity (FVC) and in 6-minute walk test (6MWT) distance through the use of the Wilcoxon rank sum test.	Urinary GAG excretion; sleep study apnea/hypopnea index (AHI, events/hour of sleep); active shoulder flexion (mean of both shoulders); and the Disability Score Index of the Childhood Health Assessment Questionnaire (CHAQ) for patients ≤18 years of age and of the Health Assessment Questionnaire (HAQ) for older patients			Baseline CHAQ/HAQ Disability Index scores were 1.9 for the placebo group and 2.0 for the laronidase group (scale of 0 to 3, with 3 themost disabled). Changes in theDisability Index after treatment were small and did not differ between groups.	No Evidence of PRO Impact
Uterine artery embolisation is superior to surgery in the short term, for the treatment of symptomatic uterine fibroids	University of Edinburgh	Clinical Medicine	Uterine-artery embolisation versus surgery for symptomatic uterine fibroids	2007	Randomised controlled trial	UK	Not specified	Quality of life at 1 year of follow-up	Assessment of findings on the EuroQol-5D questionnairethe time until the resumption of usual activities; a satisfaction score measuring whether patients would recommend the procedure to a friend; a linear-analogue pain score at 24 hours; the presence or absence of complications; and treatment failure, defined as the need for subsequent intervention for symptom control, including hysterectomy or r…	Short-Form General Health Survey SF-36 and EQ-5D	There were no significant differences between groups in any of the eight components of the SF-36 at 12 months, although at 1 month, the embolization group had significantly greater improvement in scores than the surgery group for the physical function, social function, and physical-role components.	Women in the surgical group had a significantly higher pain score at 24 hours. Symptom scores at 1 and 12 months after the procedure were significantly better in the surgical group. At 12 months, the percentage of women who reported that they would recommend their treatment to a friend was high in both treatment groups (93% in the surgical group and 88% in the embolization group) (P=0.32).	Direct PRO impact
Health and economic benefits of a self-management training programme for Type I diabetes	University of Sheffield	Allied Health Professions, Dentistry, Nursing and Pharmacy	Training in flexible, intensive insulin management to enable dietary freedom in people with type 1 diabetes: dose adjustment for normal eating (DAFNE) randomised controlled trial	2002	Randomised controlled trial	UK	Not specified	Glycated haemoglobin (HbA1c) and quality of life among patients receiving dose adjustment for normal eating (DAFNE) training or usual care	Satisfaction with treatment, psychological wellbeing, weight, blood pressure, cholesterol, triglycerides, and high density lipoprotein cholesterol. The number of insulin injections, total insulin dose, and blood glucose monitoring	Diabetes-dependent quality of life (ADDQoL) questionnaire, diabetes treatment satisfaction questionnaire (DTSQ), 12-item well-being questionnaire (W-BQ12)	At 6 months, HbA1c was significantly better in immediate DAFNE patients (mean 8.4%) than in delayed DAFNE patients (9.4%) (t=6.1, P < 0.0001). The impact of diabetes on dietary freedom was significantly improved in immediate DAFNE patients compared with delayed DAFNE patients (t= − 5.4, P < 0.0001), as was the impact of diabetes on overall quality of life (t=2.9, P < 0.01).	General wellbeing and treatment satisfaction were also significantly improved, but severe hypoglycaemia, weight, and lipids remained unchanged. Improvements in “present quality of life” did not reach significance at 6 months but were significant by 1 year	No Evidence of PRO Impact
Occupational Therapy and self-management for people with arthritis	University of Salford	Allied Health Professions, Dentistry, Nursing and Pharmacy	Self-management of fatigue in rheumatoid arthritis: a randomised controlled trial of group cognitive-behavioural therapy	2011	Two-arm, parallel randomised controlled trial	UK	Not specified	Fatigue impact at 18 weeks	Fatigue severity, coping, pain and perceived disease activity, disability, depression, helplessness, self-effi cacy and sleep were also better in CBT participants	Multi-Dimensional Assessment of Fatigue scale (MAF, 0–50) and a VAS (0-10). Health Assessment Questionnaire (HAQ), Impact HAQ (0–9), Rheumatoid Srthritis Quality-of-Life scale (0–30), Hospital Anxiety and Depression Scale (0–21), Arthritis Helplessness Index (5–30), Rheumatoid Arthritis Self-Efficacy scale (RASE, 28–140) and a sleep quality question	There were no major baseline differences between the 65 CBT and 62 control participants. At 18 weeks CBT participants reported better scores than control participants for fatigue impact: MAF 28.99 versus 23.99 (adjusted difference −5.48, 95% CI −9.50 to −1.46, p=0.008); VAS 5.99 versus 4.26 (adjusted difference −1.95, 95% CI −2.99 to −0.90, p<0.001). Standardised effect sizes for fatigue impact w…	Secondary outcomes of perceived fatigue severity, coping, disability, depression, helplessness, self-efficacy and sleep were also better in CBT participants.	No Evidence of PRO Impact
Development and Demonstration of the First Effective Therapy for Chronic Fatigue Syndrome (PACE trial)	University of Oxford	Psychology, Psychiatry and Neuroscience	Comparison of adaptive pacing therapy, cognitive behaviour therapy, graded exercise therapy, and specialist medical care for chronic fatigue syndrome (PACE): a randomised trial	2011	Parallel-group randomised trial	UK	Not specified	Fatigue, physical function up to 52 weeks after randomisation. Additionally, safety including serious adverse reactions to trial treatments were assessed	Overall health, disability, disturbed sleep, distance in m untes walked, hospital anxiety and depression scale score,29 number of chronic fatigue syndrome symptoms, and individual symptoms of postexertional malaise and poor concentration or memory	Chalder fatigue questionnaire (CFQ-11) and Short-Form Health Survey-36 (SF-36), hospital anxiety and depression scale score (HADS)	Compared with SMC alone, mean fatigue scores at 52 weeks were 3·4 (95% CI 1·8 to 5·0) points lower for CBT (p=0·0001) and 3·2 (1·7 to 4·8) points lower for GET (p=0·0003), but did not differ for APT (0·7 [−0·9 to 2·3] points lower; p=0·38). Compared with SMC alone, mean physical function scores were 7·1 (2·0 to 12·1) points higher for CBT (p=0·0068) and 9·4 (4·4 to 14·4) points higher for GET (p=…		No Evidence of PRO Impact
Inhaled heparin, a novel therapeutic approach with clinical benefits in the treatment of obstructive airways diseases	University of Portsmouth	Allied Health Professions, Dentistry, Nursing and Pharmacy	Inhaled heparin in cystic fibrosis	2006	Randomised, double-blind, placebo-controlled crossover trial	UK	Pilot trial	Change in FEV1, comparing heparin and placebo treatments	Changes in sputum levels of neutrophil elastase activity, IL-8, terminal complement complex (TCC) and myeloperoxidase (MPO); serum CRP; weight; symptom scores; quality of life and exercise capacity	VAS for the following symptoms: general well-being, energy, appetite, sleep quality, shortness of breath, cough, sputum volume and sputum colour. In addition, subjects also completed the teen–adult version of the Cystic Fibrosis Questionnaire (CFQ)	There was no significant effect of heparin upon the primary outcome measure, FEV1 (treatment effect −0.008 L; p = 0.90; 95% CI −0.15–0.13. In addition, there was no significant effect of heparin upon VAS (including those pertaining to sputum clearance; table), overall quality of life on the CFQ, or any of the three quality-of-life modules		No Evidence of PRO Impact
New approaches to the treatment of chronic pain	Birmingham City University	Allied Health Orifessions, Dentistry, Nursing and Pharmacy	Randomised double blind controlled trial by dose reduction of implanted intrathecal morphine delivery in chronic nonmalignant pain	2013	Randomised, double-blind controlled, parallel group trial	UK	Not specified	Visual analogue scale (VAS) pain score change and withdrawal from the study due to lack of efficacy during a 10-week follow-up	Functional and psychological measures based on the Oswestry Disability Index (ODI), Hospital Anxiety and Depression (HAD) scale and Coping Strategies Questionnaire (CSQ)	VAS, Oswestry Disability Index (ODI), Hospital Anxiety, Depression (HAD) and Coping Strategies Questionnaire (CSQ)	The VAS change between baseline and the last observation was lower in the control group (Mdn=11) than in the intervention group (Mdn=30.5), although not statistically significant, Z=−1.839, p=0.070; r=−0.47. The calculation of clinical changes based on the VAS scores indicated non-significant clinical changes in 10% of the patients in the dose-reduction group (intervention); minimally clinically …	There were no statistically significant differences between the randomised groups in the changes detected for ODI, HAD scale anxiety and depression and all items of CSQ between the baseline score and the final observation.	Direct PRO impact
Assessing Quality of Life and Other Patient-Reported Outcomes in Diabetes and Other Chronic Medical Conditions	University of Sheffield	Allied Health Professions, Dentistry, Nursing and Pharmacy	Training in flexible, intensive insulin management to enable dietary freedom in people with type 1 diabetes: Dose Adjustment For Normal Eating (DAFNE) randomised controlled trial	2002	Randomised controlled trial	UK	Not specified	Glycated haemoglobin (HbA1c) and quality of life among patients receiving dose adjustment for normal eating (DAFNE) training or usual care	Satisfaction with treatment, psychological wellbeing, weight, blood pressure, cholesterol, triglycerides, and high density lipoprotein cholesterol. The number of insulin injections, total insulin dose, and blood glucose monitoring	Diabetes-dependent quality of life (ADDQoL) questionnaire, diabetes treatment satisfaction questionnaire (DTSQ), 12-item well-being questionnaire (W-BQ12)	At 6 months, HbA1c was significantly better in immediate DAFNE patients (mean 8.4%) than in delayed DAFNE patients (9.4%) (t=6.1, P < 0.0001). The impact of diabetes on dietary freedom was significantly improved in immediate DAFNE patients compared with delayed DAFNE patients (t= − 5.4, P < 0.0001), as was the impact of diabetes on overall quality of life (t=2.9, P < 0.01).	General wellbeing and treatment satisfaction were also significantly improved, but severe hypoglycaemia, weight, and lipids remained unchanged. Improvements in “present quality of life” did not reach significance at 6 months but were significant by 1 year	No Evidence of PRO Impact
Major Advance in Identification and Treatment of HIV-1 Tuberculosis Immune Reconstitution Inflammatory Syndrome (TB-IRIS): A Common and Serious Complication of Antiretroviral Therapy	Imperial College London	Clinical Medicine	Randomized placebo-controlled trial of prednisone for paradoxical TB-associated immune reconstitution inflammatory syndrome	2010	Randomised, double-blind, placebo-controlled trial	International	Not specified	Cumulative days of hospital admission during the 12 week study period, combined with outpatient therapeutic procedures (including aspiration of lymph nodes, cold abscesses and serous effusions) which were assigned a value of one hospital day	TB-IRIS symptoms at week 2 and 4 visits in relation to the symptoms described at study entry	MOS-HIV	he primary combined endpoint was more frequent in the placebo than the prednisone arm (median hospital days 3 (IQR 0-9) and 0 (IQR 0-3) respectively; p=0.04).	There were significantly greater improvements in symptoms, Karnofsky score, and quality of life (MOS-HIV) in the prednisone versus the placebo arm at 2 and 4 weeks, but not at later timepoints. Chest radiographs improved significantly more in the prednisone arm at weeks 2 (p=0.002) and 4 (p=0.02). Infections on study medication occurred in more participants in prednisone than placebo arm (27 vs 1…	No Evidence of PRO Impact
Improved treatment and quality of life for patients with overactive bladder syndrome through developing new ways of administering Botulinum Toxin–A	King's College London	Clinical Medicine	Efficacy of botulinum toxin-A for treating idiopathic detrusor overactivity: results from a single center, randomized, double-blind, placebo controlled trial	2007	Double-blind, placebo, randomised controlled trial	UK	Not specified	Change in maximum cystometric capacity	Changes in overactive bladder symptoms, post-void residual, maximum detrusor pressure during filling cystometry and reflex detrusor volume.	Incontinence Impact Questionnaire short form 7 and Urogenital Distress Inventory short form 6	Significant increases in maximum cystometric capacity were observed at 4 weeks (difference 144.69 ml, 95% CI 100.95 to 215.75, p < 0.0001) and 12 weeks (difference 95.71 ml, 95% CI 47.47 to 172.45, p = 0.001) in patients treated with botulinum toxin-A compared to placebo. Botulinum toxin-A reduced frequency (p < 0.001, p = 0.003) and urgency urinary incontinence (p = 0.03, p = 0.008) episodes at …	Significant improvements in quality of life were observed following botulinum toxin-A. The extension study suggests that the beneficial effects of botulinum toxin-A are maintained for at least 24 weeks.	No Evidence of PRO Impact
Treatment Outcomes in Epilepsy (SANAD trial)	University of Liverpool	Public Health, Health Services and Primary Care	The SANAD study of effectiveness of valproate, lamotrigine, or topiramate for generalised and unclassifiable epilepsy: an unblinded randomised controlled trial	2007	Unblinded randomised controlled trial	UK	Not specified	The time from randomisation to treatment failure (stopping the randomised drug due either to inadequate seizure control or to intolerable side-effects, or both, or the addition of other antiepileptic drugs, whichever was the earliest); and the time from randomisation to the achievement of a 1 year period of remission of seizures	The time from randomisation to a first seizure (an efficacy outcome that is to some degree dependent on choice of the initial drug dose); time to achieve a 2-year remission; the incidence of clinically important adverse events and side-effects emerging after randomisation. Quality of life outcomes and cost-effectiveness	NEWQOL (Newly Diagnosed Epilepsy Quality of Life) battery	For time to treatment failure, lamotrigine was significantly better than carbamazepine (hazard ratio [HR] 0·78 [95% CI 0·63–0·97]), gabapentin (0·65 [0·52–0·80]), and topiramate (0·64 [0·52–0·79]), and had a non-significant advantage compared with oxcarbazepine (1·15 [0·86–1·54]). For time to 12-month remission carbamazepine was significantly better than gabapentin (0·75 [0·63–0·90]), and estimat…	Response rates for quality of life outcomes in arm B were 80% at baseline and 67% at 2-year follow-up. There were no significant differences in response rates between treatment groups	Indirect PRO impact

## Sheet: Sheet1
	Trial characteristics	Number of trials, (%)
	Trial phase
	I	0
	II	15 (21)
	III	50 (72)
	Other	4 (5)
	Leading study centre
	UK	62 (89)
	International	7 (11)
	PRO outcome
	Primary outcome	17 (24)
	Secondary outcome	35 (50)
	Both	11 (15)
	Primary outcome in a secondary publication	6 (8)
	PRO questionnaires used
	SF-36	17 (24)
	EQ-5D	12 (17)
	HADS	9 (13)
	VAS	9 (13)
	EORTC QLQ-C30	3 (4)
	Other	70*
	*Number of the different PRO measures identified
